# Supplementary material for: Astrocytic ApoE underlies maturation of hippocampal neurons and cognitive recovery after traumatic brain injury in mice
Source: PubMed Central journal article supplement (PMC8602391; doi:10.1038/s42003-021-02841-4), 2021-11-18

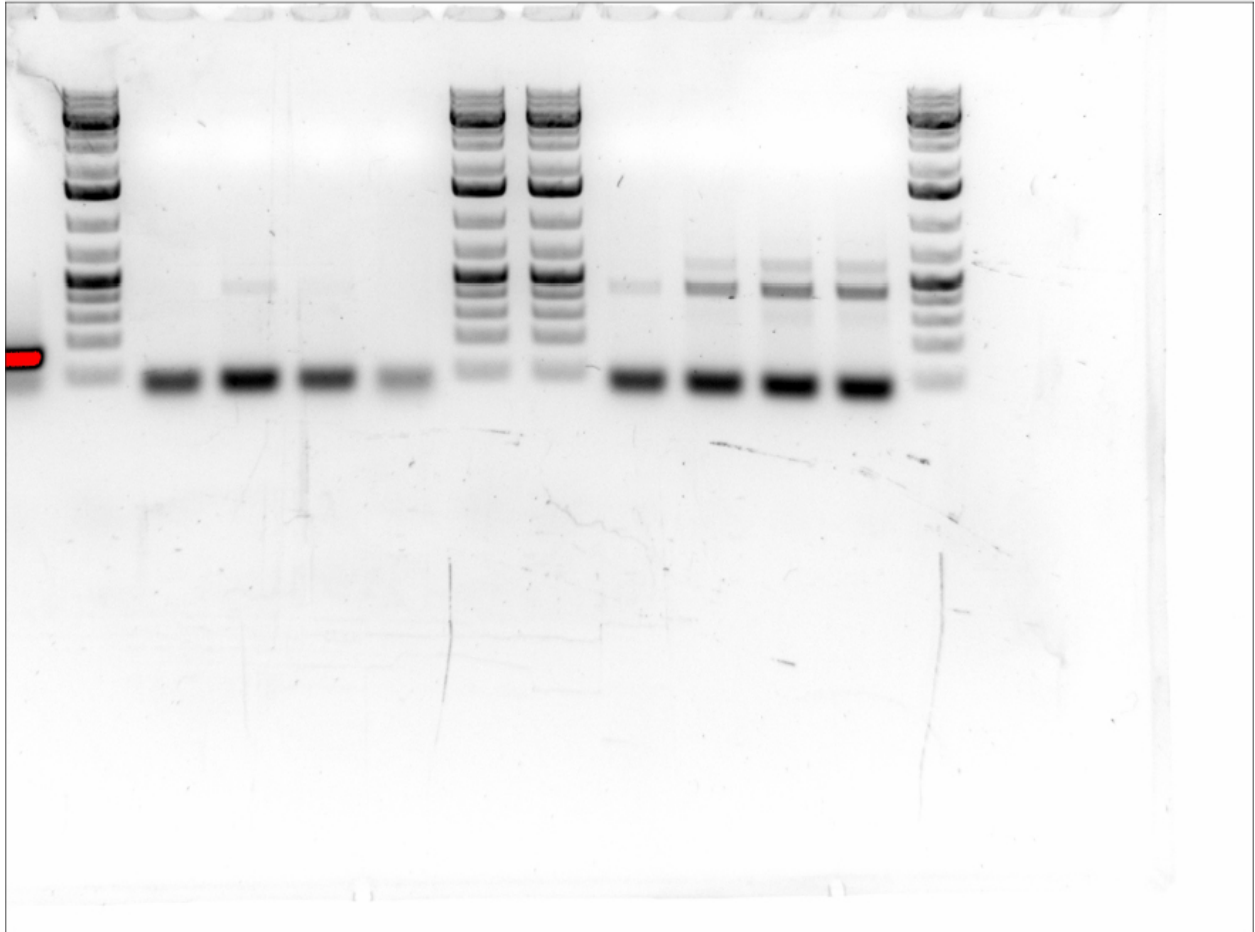

Supplement: 42003_2021_2841_MOESM2_ESM.pdf [file 42003_2021_2841_MOESM2_ESM.pdf]
