# Supplementary material for: Astrocytic ApoE underlies maturation of hippocampal neurons and cognitive recovery after traumatic brain injury in mice
Source: PubMed Central journal article supplement (PMC8602391; doi:10.1038/s42003-021-02841-4), 2021-11-18
Supplement: 42003_2021_2841_MOESM3_ESM.pdf [file 42003_2021_2841_MOESM3_ESM.pdf]

## Description of Additional Supplementary Files

**File name:** Supplementary Data 1.

**Description:** The spreadsheet has all the raw data in this study, including cell counts, normalized ApoE mRNA expression, morphological analysis, and behavioral tests.

**File name:** Supplementary Data 2.

**Description:** The statistical statement of two-way ANOVA in determining genetic and surgical effects on the complexity of dendritic trees in the pre-existing neurons in the dentate gyrus.

**File name:** Supplementary Data 3.

**Description:** The statistical statement of two-way ANOVA in determining genetic and surgical effects on the complexity of dendritic trees in the newborn neurons in the dentate gyrus.
